# Visuomotor paired associative stimulation for post-stroke hand motor impairments

Michela Picardi<sup>1,2, #, \*</sup>, Giacomo Guidali<sup>3, #, \*</sup>, Antonio Caronni<sup>4,5</sup>, Viviana Rota<sup>5</sup>,  
Massimo Corbo<sup>1</sup>, Nadia Bolognini<sup>3,6</sup>

<sup>1</sup> Department of Neurorehabilitation Sciences, Casa di Cura Igea, Milan, Italy

<sup>2</sup> PhD Program in Neuroscience, School of Medicine and Surgery, University of Milano-Bicocca, Monza, Italy

<sup>3</sup> Department of Psychology and Milan Center for Neuroscience - NeuroMI, University of Milano-Bicocca, Milan, Italy

<sup>4</sup> Department of Biomedical Sciences for Health, University of Milan, Milan, Italy

<sup>5</sup> IRCCS Istituto Auxologico Italiano, Department of Neurorehabilitation Sciences, Milan, Italy

<sup>6</sup> IRCCS Istituto Auxologico Italiano, Laboratory of Neuropsychology, Milan, Italy

*# These authors contributed equally to this work*

*\* Corresponding authors:*

Giacomo Guidali, PhD [giacomo.guidali@unimib.it](mailto:giacomo.guidali@unimib.it)

Department of Psychology, University of Milano-Bicocca, Piazza dell'Ateneo Nuovo 1, Milan, Italy

Michela Picardi, MSc [m.picardi4@campus.unimib.it](mailto:m.picardi4@campus.unimib.it)

School of Medicine and Surgery, University of Milano-Bicocca, Via Cadore 48, Monza, Italy

**Declaration of competing interest:** none

**Acknowledgments:** We thank Francesca Crespi for her valuable help during data collection.

**Funding:** This work was supported by Italian Ministry of Health - Ricerca Corrente. The project has been supported by the Grant 'PRIN 2022-NAZ-0168' from the Italian Ministry of University and Research to NB

**NOTE:** This preprint reports new research that has not been certified by peer review and should not be used to guide clinical practice.  
and GG.

## ABSTRACT

*Objectives.* We assess the effectiveness of a visuomotor *paired associative stimulation* (vm-PAS) protocol targeting the Action Observation Network (AON) in patients with chronic post-stroke upper-limb hemiparesis. Vm-PAS consisted of hand-grasping action observation stimuli repeatedly paired with transcranial magnetic stimulation (TMS) pulses over the ipsilesional primary motor cortex (M1).

*Methods.* Fifteen post-stroke patients underwent a session of the vm-PAS and, as a control, of the standard excitatory PAS (M1-PAS), during which slow-rate electrical stimulation of the paretic limb was paired with M1-TMS. Before and after each PAS, we assessed corticospinal excitability (CSE), short-interval intracortical inhibition (SICI), and paretic wrist's voluntary movements.

*Results.* The two protocols induce distinct muscle-specific CSE enhancements: vm-PAS increases motor-evoked potentials (MEPs) recorded from the paretic *first dorsal interosseous* muscle. Conversely, M1-PAS increases MEPs recorded from the electrically stimulated *extensor carpi radialis* muscle. Vm-PAS efficacy correlates with hemiparesis chronicity: the higher the time elapsed since the stroke, the greater vm-PAS effects on CSE. Neither protocol affected SICI or wrist movements.

*Conclusion.* Vm-PAS leads to muscle-specific enhancements of CSE in post-stroke patients, highlighting its potential for driving post-stroke motor recovery.

*Significance.* Our findings show the efficacy of a cross-modal PAS protocol targeting the AON in an injured motor system.

**Keywords:** stroke, paired associative stimulation, action observation, transcranial magnetic stimulation, primary motor cortex, hemiparesis, mirror neuron system

## 1. INTRODUCTION

Motor impairments after a stroke are the primary cause of disability in adults (Mayo et al., 2002). Six months after a stroke, between 50% and 70% of patients still suffer from upper extremity disabilities, such as paresis and spasticity, for which the chances of recovery are drastically limited even despite continuing intensive rehabilitation treatments (Lang et al., 2016; Pollock et al., 2014). Non-invasive brain stimulation (NIBS) may help maximize post-stroke motor recovery by modulating cortical excitability and brain plasticity even in the chronic phase of illness (Ahmed et al., 2011; Anwer et al., 2022; Di Pino et al., 2014; Su & Xu, 2020).

Among the NIBS techniques, paired associative stimulation (PAS) has attracted neuroscientific and clinical research because it can target specific cortico-peripheral and cortico-cortical pathways in a timing-dependent way (Guidali et al., 2021b, 2021a). PAS repeatedly pairs time-locked peripheral and cortical stimulations, the last represented by a transcranial magnetic stimulation (TMS) pulse over the cortical site of interest. This repeated contingency promotes the functional reorganization of brain networks through mechanisms of Hebbian associative plasticity within the target area/circuit (Suppa et al., 2017). The classic version of the PAS (here, M1-PAS); combines TMS pulses applied to the primary motor cortex (M1) with peripheral electrical stimulation (Stefan et al., 2000; Wolters et al., 2003). Its effectiveness in inducing long-term potentiation or depression of corticospinal excitability (CSE) is well-documented in healthy subjects but, to a lesser extent, in the clinical population (Baroni et al., 2024; Wischniewski & Schutter, 2016). In the case of stroke patients, the presence of hemiparesis or hemianesthesia may compromise the effectiveness of the peripheral electrical stimulation required to activate the motor system through the afferent pathway, in turn impacting the induction of associative plasticity (Ferris et al., 2018; Silverstein et al., 2019). To overcome this issue, accessing the motor system through other afferent pathways, such as via the visual system, may be useful, considering that they might be preserved in patients with hemiparesis. This indirect access to the motor system could be achieved by taking advantage of a novel, visuomotor version of the PAS that pairs action observation stimuli with TMS pulses over M1 (the so-called mirror-PAS) (Guidali et al., 2020). Indeed, in healthy individuals, this repeated coupling was shown to promote associative plasticity mechanisms within M1, likely driven by the recruitment of the Action Observation Network (AON) (Kemmerer, 2021; Rizzolatti & Craighero, 2004), with benefits detectable at the neurophysiological and behavioral level (Guidali et al., 2020, 2024; Guidali, Picardi, Gramegna, et al., 2023). However, to date, the potential of visuomotor versions of the PAS for post-

stroke motor deficits has not yet been determined, although substantial clinical improvements can be achieved through AON activation, as demonstrated by rehabilitation approaches such as the mirror box illusion and action observation therapies (Thieme et al., 2018; Zhang et al., 2023).

In this scenario, the present proof-of-principle study explored the effectiveness of a visuomotor PAS (vm-PAS) applied over the ipsilesional motor cortex during the passive observation of hand grasping actions in a sample of post-stroke patients with chronic upper limb hemiparesis, comparing its effect to those induced by an excitatory version of the conventional M1-PAS (Castel-Lacanal et al., 2007, 2009; Tarri et al., 2018). Patients underwent a single session of both PAS protocols, assessing their efficacy at the neurophysiological level (primary outcome: corticospinal excitability - CSE - and short-interval intracortical inhibition – SICI) and behavioral level (secondary outcome: voluntary wrist movement of the paretic limb). CSE and SICI were measured by recording motor-evoked potentials (MEPs) from three different muscles of the paretic upper limb (i.e., *extensor carpi radialis* – ECR, *flexor carpi radialis* – FCR, and *first dorsal interosseus* – FDI) to verify the extent to which the vm-PAS aftereffects are selective for the muscles involved in the observed action, as predicted by the functionality of the AON (e.g., Fadiga et al., 1995; Guidali et al., 2020; Guidali, Picardi, Franca, et al., 2023; Naish et al., 2014).

## 2. MATERIALS AND METHODS

### 2.1. Participants

Twenty adults with chronic post-stroke upper-limb hemiparesis were recruited at the Department of Neurorehabilitation Sciences of the Istituto Auxologico Italiano (Capitanio Hospital, Milan, IT), according to the following inclusion criteria: aged between 18-85 years; affected by ischemic or hemorrhagic stroke, cortical or subcortical, in supratentorial site; stroke occurred from at least 4 months; the presence of clinically documented upper limb hemiparesis in the dominant (before stroke) hand; no history of psychiatric, neurological, neuropsychological and musculoskeletal conditions that compromise upper limb function or prevent understanding experimental instructions; no contraindications to TMS (Rossi et al., 2021). Two out of 20 patients dropped out for personal issues, and for 3 patients, reliable MEPs could not be evoked in the target muscles at the baseline assessment (see **Study design**). Thus, the final analyzed sample comprised 15 patients with right-hand hemiparesis, whose demographic and clinical characteristics are summarized in **Table 1**.

We determined the sample size through an a-priori within-subjects repeated measures analysis of variance (rmANOVA) using the software G\*Power 3.1 (Faul et al., 2009) and selecting as the target effect size value the smallest one among those found in our previous studies using visuomotor PAS protocols (Guidali et al., 2020, 2024; Guidali, Picardi, Gramegna, et al., 2023), which corresponded to a partial eta squared ( $\eta_p^2$ ) of .16 [Experiment 1 in (Guidali, Picardi, Gramegna, et al., 2023)]. The power analysis (alpha:  $p = .05$ ; statistical power = .8, actual power = .85) showed a recommended sample size of at least 14 participants to achieve enough statistical power for detecting PAS effects.

All patients provided their written informed consent to participate in this study, which was performed following the standards of the Declaration of Helsinki (2013) and obtained approval by the local Ethics Committee (protocol n° 25C212) of the Istituto Auxologico Italiano.

## **2.2. TMS and electromyographic (EMG) recording**

TMS pulses were delivered with a figure-of-eight coil ( $\varnothing = 70$  mm) connected to a monophasic stimulator (Magstim 200<sup>2</sup>, The Magstim Company Ltd, Whitland, UK) over the ECR hotspot of the ipsilesional (left in every patient) M1. The hotspot was defined as the stimulation site consistently inducing the largest MEPs in the paretic ECR muscle, with visually detectable wrist extension at intensities above the resting motor threshold (rMT). Importantly, in all our patients, the supra-threshold stimulation of this point (see **Neurophysiological assessment**) also elicited MEPs in the other two muscles of interest (FDI and FCR). The individual rMT was determined in each PAS session using the parameter estimation by sequential testing procedure, a maximum-likelihood threshold-hunting procedure optimized for rMT detection (Awiszus, 2003; Dissanayaka et al., 2018). The mean rMT was  $55.8 \pm 18.8\%$  in the vm-PAS session and  $55.5 \pm 19.2\%$  in the M1-PAS session ( $t_{14} = .51, p = .62$ ). ECR representation in M1 was targeted by positioning the coil  $45^\circ$  to the midline, tangential to the scalp, inducing a posterior-anterior current flow. Neuronavigation was performed to monitor stable coil positioning during the TMS stimulation (SofTactic Optic 3.4, EMS, Bologna, IT).

EMG was recorded from paretic's ECR, FDI, and FCR muscles with surface electrodes (15 X 20 mm Ag-AgCl pre-gelled surface electrodes, Friendship Medical, Xi'an, China) in a tendon-belly arrangement. The ground electrode was placed over the head of the ulna. The EMG signal was monitored online on a computer screen. Before data acquisition, the experimenter did a visual inspection to guarantee that the background noise

from the three muscles was  $<30 \mu\text{V}$ . The raw signal was sampled (5000 Hz), amplified, notch filtered (bandpass 10-1000 Hz), and stored for offline analysis by using Signal software (6.0 version, Cambridge Electronic Devices, Cambridge, UK) connected to a 1902 amplifier and CED Power1401 A/D converter.

## **2.2. PAS protocols**

During both PAS protocols, TMS pulses were applied over the ECR representation in the M1 of the injured left hemisphere.

In the vm-PAS (**Figure 1a**), each TMS pulse (intensity= 120% rMT) was paired with a visual stimulus of movement created by presenting two frames: a first ('static') frame lasting 4250 ms, depicting a hand viewed from an egocentric perspective and a bottle, which was followed, after an interstimulus interval (ISI) of 25 ms, by a second ('action') frame of 750 ms showing the same hand grasping the bottle. The rapid presentation of the second frame gave the perception of the hand's apparent motion, performing a reaching-to-grasp action. This type of visual stimulus is suitable for the clinical population, being typically exploited in action observation therapies for stroke patients (Franceschini et al., 2012; Tropea et al., 2023). One hundred eighty paired visual and TMS stimuli were delivered at .2 Hz (Guidali et al., 2020, 2024; Guidali, Picardi, Gramegna, et al., 2023). To ensure that patients paid attention to the visual stimuli, we asked them to count how many times the bottle was grasped by the depicted hand. E-Prime software (3.0, Psychology Software Tool, Inc., Pittsburgh, USA) controlled the timing of the stimuli and TMS administration.

The M1-PAS (**Figure 1b**) consisted of trains of ECR electrical stimulation (5 stimuli at 10 Hz with square waves of 1 ms; intensity adjusted to produce the minimal visible ECR contraction) paired with the TMS over M1 at 120% rMT. The peripheral stimulation of the ECR was chosen based on previous M1-PAS literature on stroke patients (Castel-Lacanal et al., 2007, 2009; Tarri et al., 2018) and given the importance of this muscle in hand motor recovery since it stabilizes the wrist and ensures an effective hand grip (Kamper et al., 2003). TMS pulses were applied with an ISI of 25 ms from the last electric stimuli of the train. One hundred eighty paired stimulations were administered at .1 Hz (Carson & Rankin, 2018; Castel-Lacanal et al., 2007, 2009). Electrical stimulation was delivered with a constant current stimulator (Digitimer DS7AH, Digitimer Ltd., Welwyn, UK) and a belly-belly electrode arrangement. During the M1-PAS, patients were asked to count the

number of peripheral electrical stimuli received (Stefan et al., 2004). Electric and TMS stimuli were delivered under computer control (Signal software).

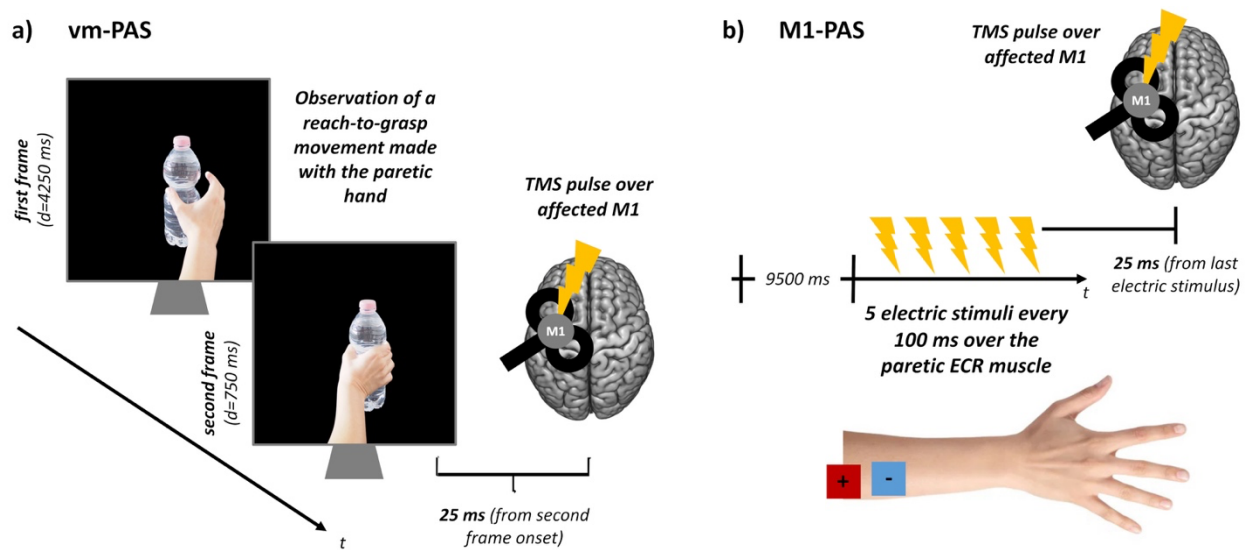

**Figure 1.** Schematic illustration of the vm-PAS (a) and the M1-PAS (b) protocols.

### 2.3. Neurophysiological assessment

During the neurophysiological assessment, patients were seated in a comfortable position with both upper limbs at rest on the table (the paretic upper limb was in a pronated position and supported on a cushion); they were instructed to keep eyes fixation on a red asterisk appearing on the PC screen in front of them.

CSE was assessed by administering 30 TMS pulses at 120% rMT over the ECR representation in the ipsilesional M1, with an inter-trial interval between 4000 and 5000 ms. SICI was assessed using a dual-coil device (Magstim BiStim<sup>2</sup>, The Magstim Company Ltd, Whitland, UK) by applying a conditioning TMS stimulus at 80% rMT over the ECR representation in ipsilesional M1 followed, after 2 ms, by a test pulse at 120% rMT over the same cortical site (Kujirai et al., 1993). Fifteen paired and 15 single pulses were randomly delivered every 10 sec to record conditioned and unconditioned MEPs.

### 2.4. Measurement of voluntary wrist movement

The wrist's voluntary movement of the paretic limb was captured by using an inertial movement unit (IMU) (Martino Cinnera et al., 2024), consisting of an integrated unit composed of a 3-axis gyroscope, a 3-axis accelerometer, and a magnetometer (G-sensor, BTS Bioengineering Corp., Quincy, USA). Patients sat



comfortably with their affected forearm stabilized on the chair's armrest. The wrist was free to move, with the forearm pronated for the extension movement and supinated for the flexion movement assessment. The IMU was fixed to the dorsal surface of the hand at the level of the third metacarpal bone and tightly secured to the participant's skin with adhesive tape. After a familiarization period, the subject was asked to perform two ballistic movements as fast as possible: extension and flexion of the wrist. Each movement was performed 5 times, with 5 sec of rest between them. The wrist movements were recorded using the BTS software (G-studio).

## **2.5. Study design**

Before taking part in the experiment, on a separate day from PAS sessions, patients underwent a baseline assessment comprising the Fugl-Meyer Assessment Upper Limb scale – FMA-UL (Fugl-Meyer et al., 1975), the Hand Grip Strength test – HGS (Hamilton et al., 1992), and the Oxford Cognitive Scale – OCS (Mancuso et al., 2016) (see **Table 1** and **Supplemental Table 1**). Experimenters also checked if MEPs greater than 100  $\mu$ V can be reliably recorded at supra-threshold intensities in the paretic limb from the three target muscles.

The experiment consisted of two counterbalanced within-subject sessions during which patients underwent the vm-PAS and the M1-PAS, whose order was randomized across patients. Immediately before and after each PAS, patients underwent the neurophysiological assessment (i.e., CSE and SICI) and the measurement of the paretic limb's voluntary wrist movement. The neurophysiological and behavioral assessment order was kept fixed for all patients.

Each patient underwent the two PAS at the same time of the day (i.e., in the morning or the afternoon) to control for any potential influence of circadian rhythms (Sale et al., 2007), with at least 72 hours between the two sessions. Each PAS session lasted about 1 hour and a half.

## **2.6. Statistical analyses**

Data analyses were conducted using the software Jamovi with the package GAMLj [v. 2.4.12; (The Jamovi Project, 2023)] and R Studio (R Core Team, 2019). In every analysis, statistical significance was set with  $p \leq .05$ , and significant effects were explored with post-hoc tests with the Bonferroni correction for multiple comparisons. Variables are reported as mean  $\pm$  standard error (SE). Detailed results from all the analyses can be found in **Supplemental Tables 3-10**.



The study's datasets and scripts will be publicly available after publication at: <https://osf.io/xgn7f>

### **2.6.1. Neurophysiological assessment**

MEPs were preprocessed with Signal software, exploiting the standard pipeline used in our laboratory (Guidali, Picardi, Gramegna, et al., 2023). Trials with muscular artifacts or background noise deviating from 200  $\mu$ V in the 100 ms before the TMS pulse were automatically excluded from the analysis. Then, MEP peak-to-peak amplitude was calculated in each trial in the time window between 10 ms and 60 ms from the TMS pulse. Trials with MEP amplitude smaller than 50  $\mu$ V were excluded from the analyses.

Visual inspection of the QQ-plot and skewness/kurtosis values showed that raw MEP amplitudes were not normally distributed during CSE and SICI assessments. Base-10 log transformation made the distribution closer to normality (see **Supplemental Table 2**); hence, MEPs were transformed accordingly and then analyzed using linear mixed models (LMMs). Each muscle (ECR, FDI, and FCR) was analyzed separately with within-subjects factors 'PAS' (vm-PAS, M1-PAS), 'Time' (pre-PAS, post-PAS), and their interaction as fixed effects; the intercept as the random one; and the patient as the cluster variable. For SICI, the within-subjects factor 'MEP type' (conditioned, unconditioned) was included in the model. Two patients were excluded from the SICI analysis due to recording issues during its assessment.

### **2.6.2. Voluntary wrist movement**

IMU signal extraction was performed using Signal software. For each of the 5 wrist's extension and flexion movements, the following measures were manually scored, and their median was considered as the dependent variable: range of motion (ROM,  $^{\circ}$ ); maximum peak of angular velocity (AV,  $^{\circ}/s$ ); peak of movement's acceleration (ACC,  $^{\circ}/s^2$ ), calculated as the ratio between the maximum peak of angular velocity and its latency. Then, these parameters were analyzed through a rmANOVA with within-subjects factors 'PAS' and 'Time', separated for extension and flexion movements.

### **2.6.3. Correlations between PAS modulation and patients' clinical profile**

We run Spearman's correlation analyses to explore the influence of stroke chronicity and severity of motor impairment (i.e., scores at FMA-UL and HGS for the affected hand; **Table 1**) on significant PAS-induced

enhancement of CSE (see **Results**) expressed as the ratio between MEPs recorded at rest after and before protocols' administration:  $PAS\ effect(\%) = \frac{MEPs\ after\ PAS(mean)}{MEPs\ before\ PAS(mean)}$ . Positive values express MEP enhancement after PAS, while negative ones show MEP depression.

### 3. RESULTS

#### 3.1. Neurophysiological assessment

Considering CSE for the ECR muscle, LMM showed a significant main effect of 'Time' ( $F_{1,1734} = 21.85, p < .001$ ) and 'PAS' X 'Time' interaction ( $F_{1,1734} = 47.72, p < .001$ ): CSE (i.e.,  $\log_{10}$ -transformed MEP,  $\mu V$ ) significantly increased only after M1-PAS (post-M1-PAS:  $2.64 \pm .08$  vs. pre-M1-PAS:  $2.53 \pm .07, t_{1734} = 8.22, p < .001$ ; vs. pre-vm-PAS:  $2.60 \pm .06, t_{1734} = 2.71, p = .041$ ; vs. post-vm-PAS:  $2.58 \pm .08, t_{1734} = 4.29, p < .001$ ). Conversely, after the vm-PAS, no modulation of ECR MEPs was found ( $t_{1734} = 1.57, p = .7$ ). At the single-subject level, 13 out of 15 patients showed an increase of ECR MEPs amplitude, with an overall mean increase of  $+33\% \pm 8.6\%$  (range  $-9/+104\%$ ; **Figure 2a**).

For FDI, LMM showed a main effect of 'PAS' ( $F_{1,1734} = 14.86, p < .001$ ), 'Time' ( $F_{1,1734} = 6.57, p = .01$ ), and their interaction ( $F_{1,1734} = 15.77, p < .001$ ). Post-hoc comparisons showed the opposite pattern than the one found for ECR: CSE increased only after the vm-PAS protocol (post-vm-PAS:  $2.88 \pm .1$  vs. pre-vm-PAS:  $2.82 \pm .09, t_{1734} = 4.60, p < .001$ ; vs. pre-M1-PAS:  $2.83 \pm .09, t_{1734} = 4.53, p < .001$ ; vs. post-M1-PAS:  $2.82 \pm .1, t_{1734} = 5.55, p < .001$ ), while no modulation was found after M1-PAS ( $t_{1734} = 1, p = .99$ ). At the single-subject level, 11 out of 15 patients were vm-PAS responders (mean enhancement  $+17 \pm 7.7\%$ ; range  $-35/+80\%$ ; **Figure 2b**). Concerning the FCR muscle, we found main effects of factors 'PAS' ( $F_{1,1734} = 55.02, p < .001$  – MEPs recorded during vm-PAS session were greater than in M1-PAS session) and 'Time' ( $F_{1,1734} = 5.72, p = .017$  – MEPs were greater after both PAS administration), but not of their interaction ( $F_{1,1734} = .16, p = .688$ ; **Figure 2c**).

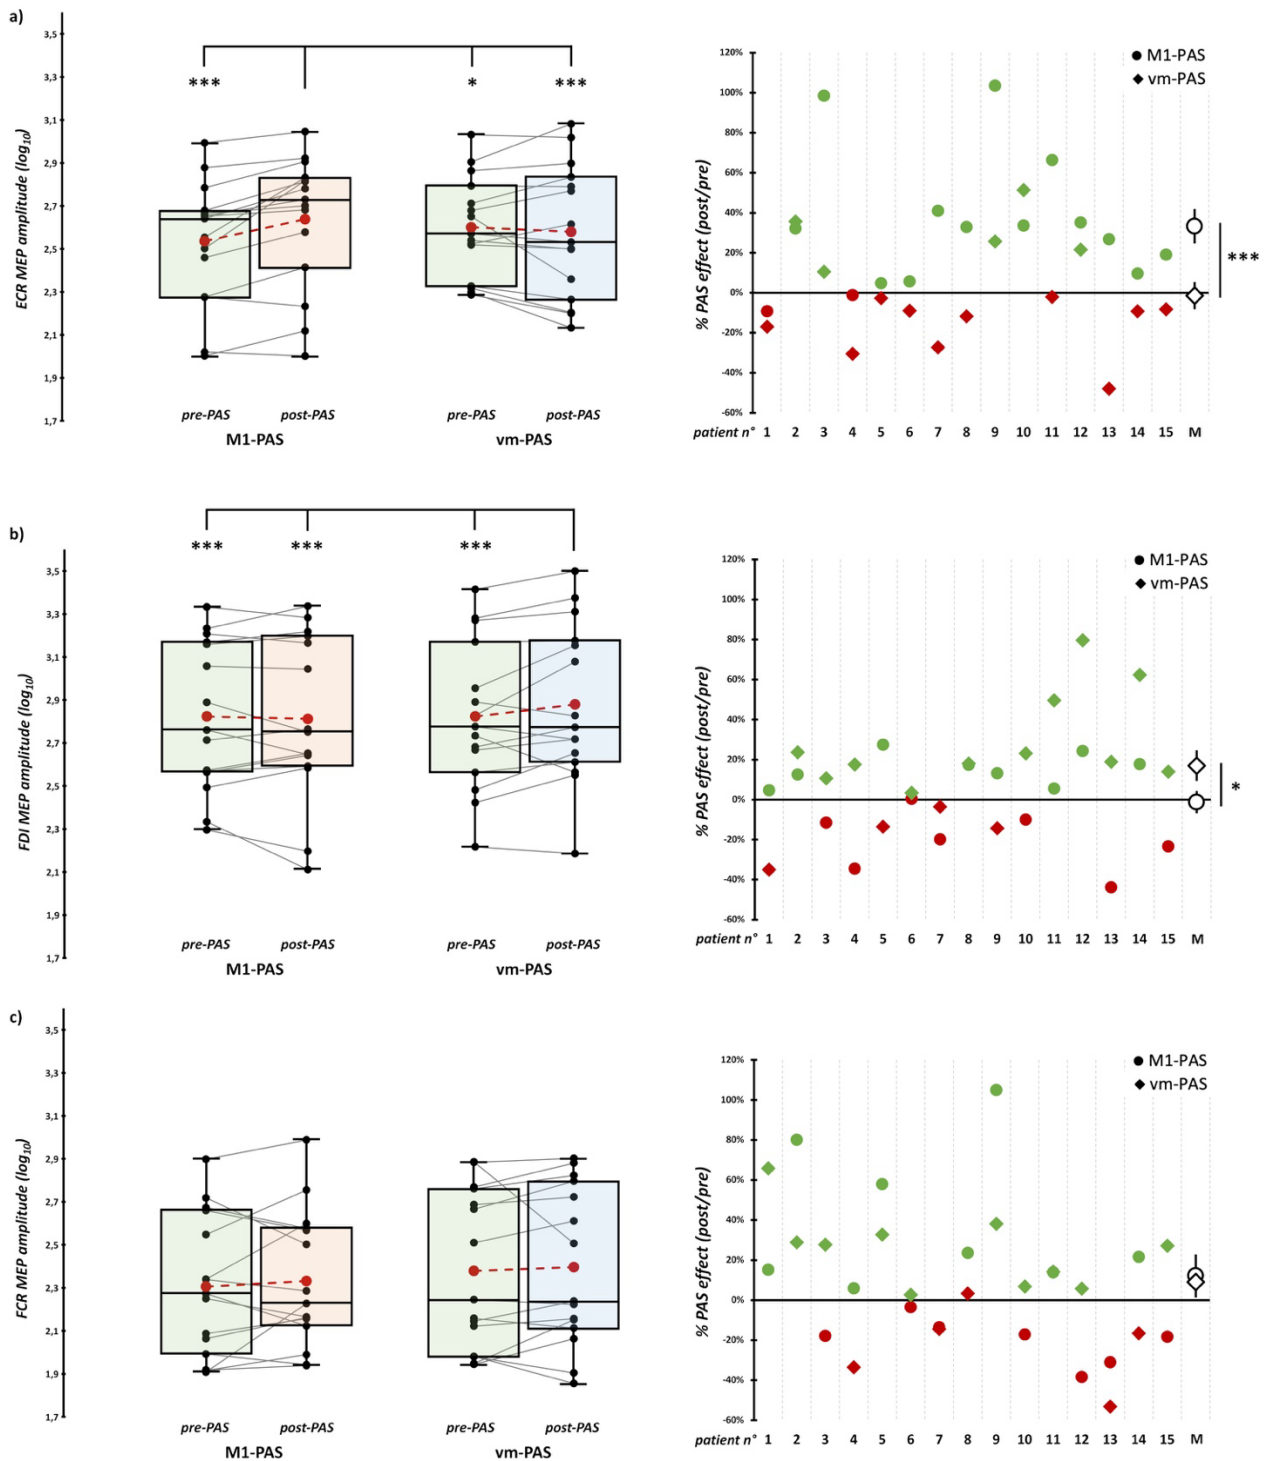

**Figure 2.** Left panels: results from the assessment of CSE for ECR (a), FDI (b), and FCR (c) before (green boxes) and after vm-PAS (blue boxes) and M1-PAS (orange boxes) administration. In the box-and-whiskers plots, red dots and lines indicate the means of the distributions. The center line denotes their median values. Black dots and grey lines depict individual MEP values. The box contains the 25th to 75th percentiles of the dataset. Whiskers extend to the largest observation falling within the 1.5 \* inter-quartile range from the 1<sup>st</sup>/3<sup>rd</sup> quartile. Right panels: single-

patients MEP enhancement after vm-PAS (rhombi) and M1-PAS (circles) administration. Green rhombi/circles indicate MEP enhancement, while red ones indicate MEP depression. The last row (M) indicates the mean effects of the two PAS. Asterisks indicate significant differences between conditions (\* =  $p < .05$ , \*\* =  $p < .01$ , \*\*\* =  $p < .001$ ; Bonferroni corrected).

Considering SICI assessment, LMMs on ( $\log_{10}$ -transformed) MEPs showed significant effects for the main factor ‘MEP type’ for all our target muscles (all  $F_s > 50.62$ ; all  $p_s < .001$ ; **Supplemental Tables 6-8**): unconditioned MEPs had a greater peak-to-peak amplitude than conditioned one. Furthermore, we found a significant ‘PAS’ X ‘Time’ interaction only for ECR ( $F_{1,1503} = 10.93$ ,  $p < .001$ ) and FDI muscles ( $F_{1,1503} = 10.15$ ,  $p = .001$ ): i.e., regardless of being conditioned or unconditioned MEPs, their amplitude was enhanced after M1-PAS administration (all  $t_s > 4.24$ , all  $p_s < .001$ ) and after vm-PAS (all  $t_s > 4.69$ , all  $p_s < .001$ ), respectively (**Figure 3a, b**).

The triple interaction ‘PAS’ X ‘Time’ X ‘MEP type’ and the other double interactions did not reach statistical significance (all  $F_s < 3.07$ ; all  $p_s > .08$ ).

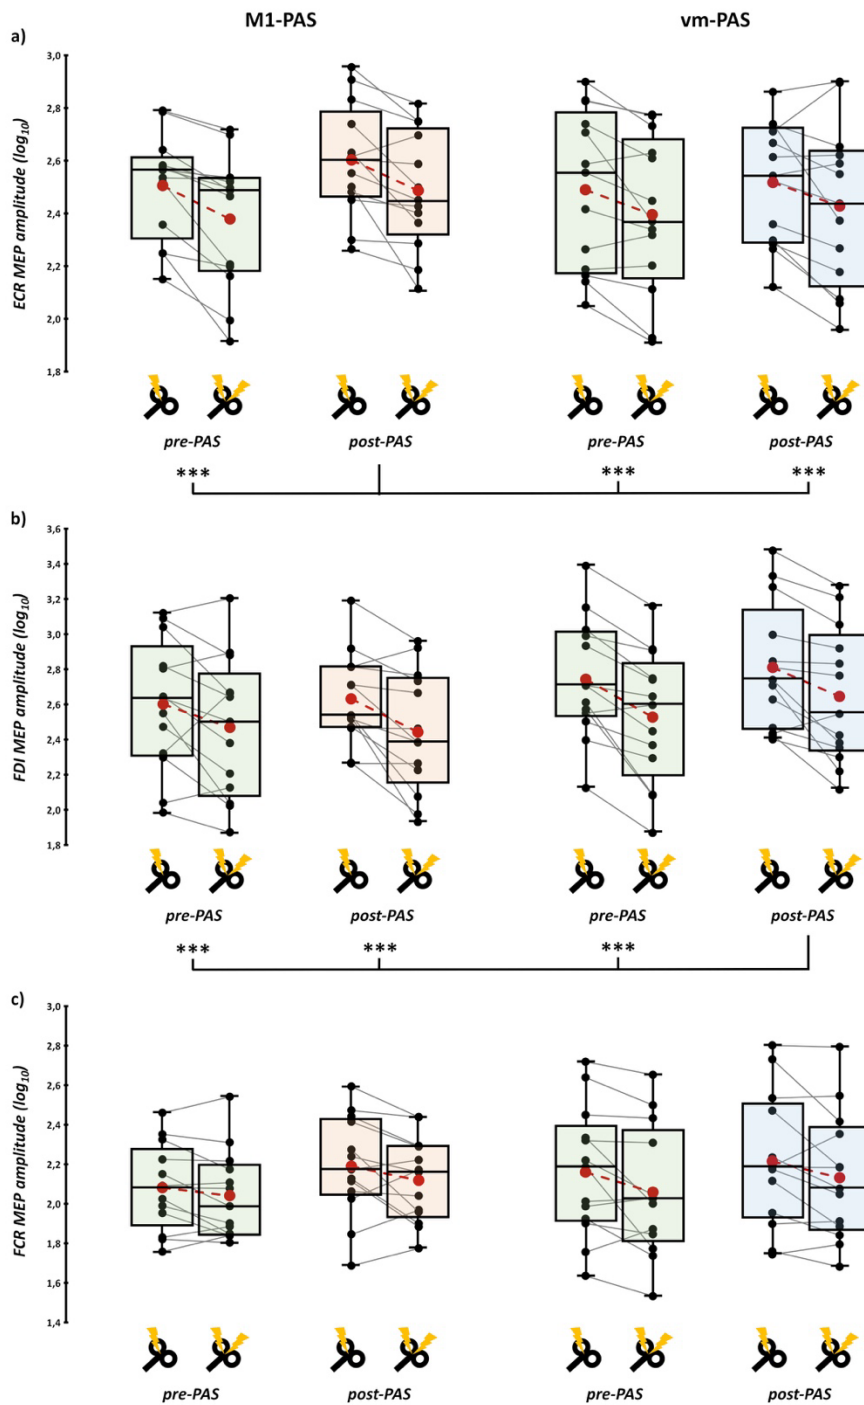

**Figure 3.** Results from the SICI assessment for ECR (a), FDI (b), and FCR (c) muscles before (green boxes) and after vm-PAS (blue boxes) and M1-PAS (orange boxes) administration. Red dots and lines indicate the means of the distributions. The center line denotes their median values. Black dots and grey lines show individual values. The box contains the 25th to 75th percentiles of the dataset. Whiskers extend to the largest observation falling within the 1.5 \* inter-quartile range from the first/third quartile. Asterisks indicate significant differences between conditions (\* =  $p < .05$ , \*\* =  $p < .01$ ; \*\*\* =  $p < .001$ ; Bonferroni corrected).

### 3.2. Voluntary wrist movement

Considering median ROM, AV, and ACC values, every rmANOVA did not show significant main effects or interactions (all  $F_s < 3.51$ , all  $p_s > .082$ ; **Figure 4**; **Supplemental Tables 9-10**).

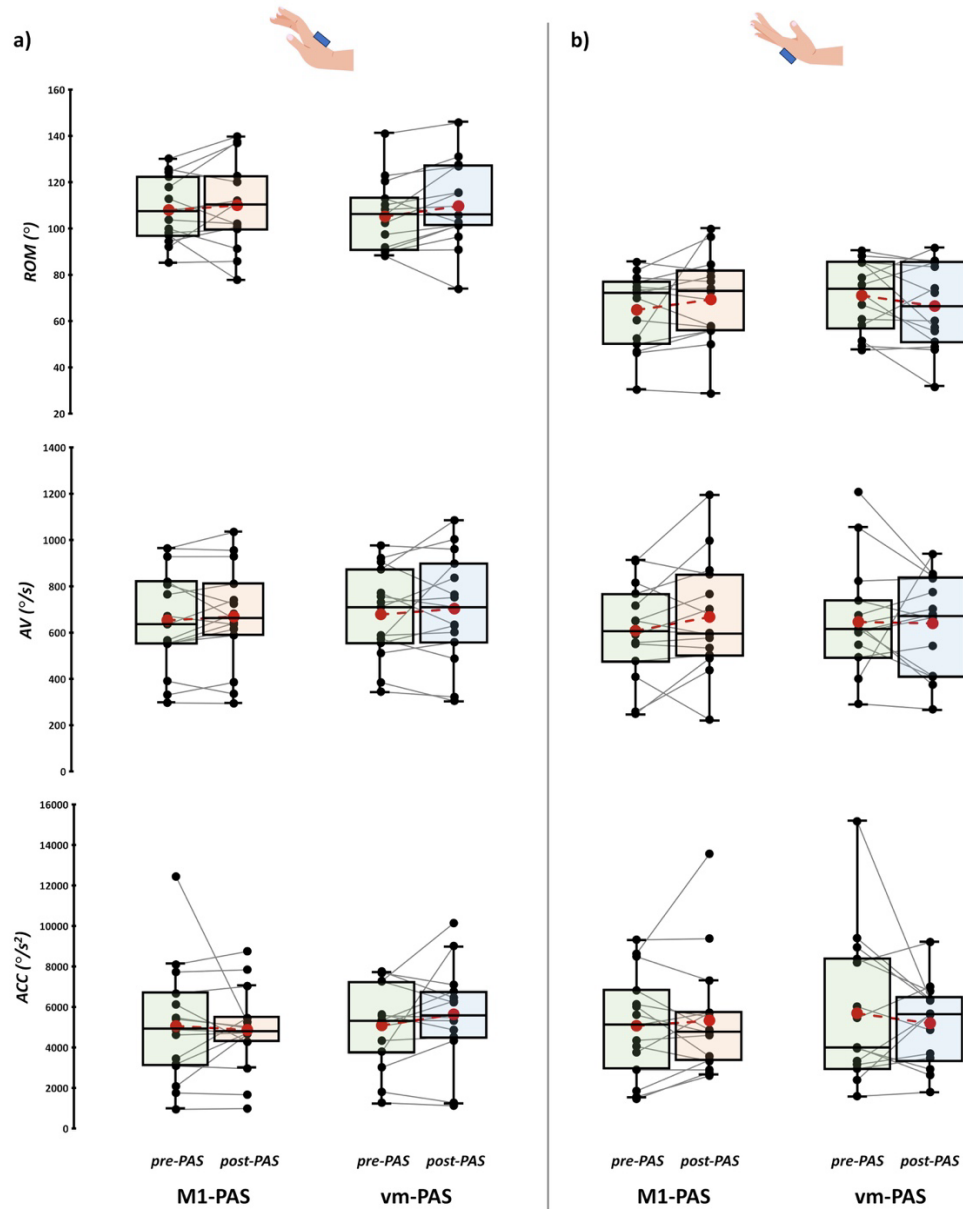

**Figure 4.** Results from voluntary movement assessment during parietic wrist extension (a) and flexion (b), before (green boxes) and after vm-PAS (blue boxes) and M1-PAS (orange boxes) administration. Red dots and lines indicate the means of the distributions. The center line denotes their median values. Black dots and grey lines show individual scores. The box contains the 25th to 75th percentiles of the dataset. Whiskers extend to the largest observation falling within the 1.5 \* inter-quartile range from the first/third quartile.

### 3.3. Correlations between PAS modulation and patients' clinical profile

We found a significant positive correlation between vm-PAS effects on CSE and stroke chronicity: namely, the more time elapsed from the stroke, the greater the enhancement of FDI MEPs, and thus the efficacy of the vm-PAS ( $\rho = .53$ ,  $p = .042$ ). The same pattern was not found for ECR after M1-PAS ( $\rho = -.06$ ,  $p = .82$ ). Similarly, also the PAS-unspecific CSE enhancement found for FCR did not correlate with stroke chronicity (vm-PAS:  $\rho = -.37$ ,  $p = .172$ ; M1-PAS:  $\rho = -.32$ ,  $p = .247$ ; **Figure 5**).

Considering FMA-UL and HGS scores, we found no significant correlations with the effects of both PAS protocols (all  $\rho$ s  $> -.35$ , all  $p$ s  $< .196$ ; **Supplemental Figure 1**).

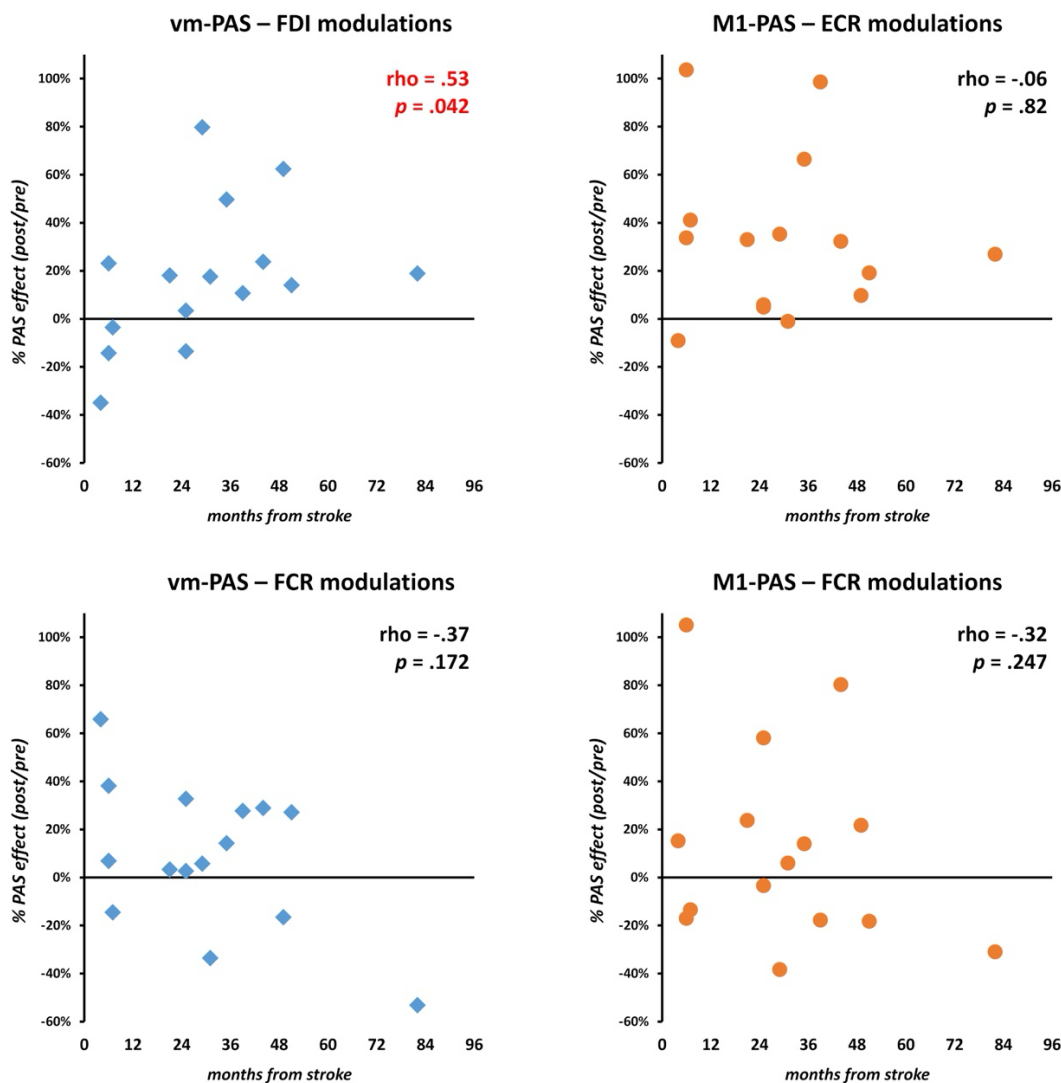

**Figure 5.** Correlations between the percentage of MEP enhancement after PAS administration (left panels: vm-PAS, right panels: M1-PAS) and stroke chronicity.



#### 4. DISCUSSION

The present study shows the effectiveness of the vm-PAS in a cohort of chronic post-stroke patients with upper limb hemiparesis. This PAS protocol pairs TMS pulses over the ipsilesional M1 with visual stimuli of a reach-to-grasp action, enhancing, after its administration, CSE of the paretic limb in a muscle-specific fashion. At the same time, we also provide further support for the effectiveness of the standard M1-PAS that, however, modulates CSE with a different muscle-specific profile than vm-PAS.

The vm-PAS leverages adaptive mechanisms of visuomotor interaction mediated by the activation of the AON during the observation of the conditioned reach-to-grasp action. The repeated observation of the hand action during the protocol recruits this high-order sensorimotor network and, thanks to the time-locked coupling with the exogenous, TMS-driven activation of the ipsilesional M1, promotes the induction of associative plasticity within the injured motor system, in turn enhancing CSE in the paretic limb after its administration. The vm-PAS likely strengthens cortico-cortical pathways of the AON (as suggested by recent evidence with cortico-cortical PAS on the healthy, see, e.g., Chiappini et al., 2024; Turrini et al., 2024), but it does not require the integrity of the afferent sensory pathway from the affected limb for the induction of plasticity within M1, as indeed happens for the standard M1-PAS (Suppa et al., 2017). Indeed, the vm-PAS protocol recruits the lesioned motor system through an indirect, visual-mediated pathway, usually spared in patients with hemiparesis. This evidence not only corroborates previous works in healthy individuals (Guidali et al., 2020, 2024; Guidali, Picardi, Gramegna, et al., 2023), but it also documents the efficacy of the vm-PAS for enhancing motor cortex excitability in an injured motor network.

An intriguing finding is the muscle-selective enhancement of ipsilesional M1 excitability, which further supports the contribution of the AON (e.g., Amoruso & Urgesi, 2016; Bunday et al., 2016; Cavallo et al., 2012; Gangitano et al., 2001; Guidali, Picardi, Franca, et al., 2023; Koch et al., 2010): the vm-PAS drives the mirror recruitment of the muscles involved in the observed grasping action, namely FDI and FCR, rather than the muscle primarily engaged in the reaching phase (ECR; (Anson et al., 2002; Montagna et al., 2005)) and plasticity in M1 is induced accordingly. Such muscle-specific modulation could have been further maximized by attention. Indeed, during the vm-PAS session, patients were instructed to ‘*count the number of times the bottle was grasped by the hand*’ to the best of their ability, focusing their attention on the target of the visual movement, hence on the hand grasping the bottle, rather than the wrist movement. An additional factor

favoring this sort of attentional capture is the ‘single-frame’ nature of the visual stimulus of the vm-PAS, depicting the reach-to-grasp movement that, unlike a video, does not show the entire action sequence but only the end of the action, that is the grasping phase. Considering the crucial role of the observer’s attention for motor resonance and AON functioning (e.g., Puglisi et al., 2017; Schuch et al., 2010), as well as for the PAS efficacy (Stefan et al., 2004), the focus of patients’ attention on the grasping phase of the observed action may have maximized the mirror activation of FDI and FCR representations in M1. This focus has, in turn, favored a muscle-specific enhancement of MEPs according to the final grasping phase of the observed action (Guidali, Picardi, Franca, et al., 2023).

Of interest are the complementary effects brought about by the M1-PAS. With this protocol, we replicate the MEP enhancement of ECR and FCR muscles found in previous studies using, as here, the exact version of the M1-PAS (Castel-Lacanal et al., 2007, 2009), but in a larger cohort of stroke patients [n=15 vs. 2 and 6 of (Castel-Lacanal et al., 2007) and (Castel-Lacanal et al., 2009), respectively]. At variance of the vm-PAS, the M1-PAS increases MEPs recorded from ECR, the muscle electrically stimulated during the PAS, and FCR without affecting MEPs from the FDI muscle. This result is at odds with the ‘topographical specificity’ of the electrical PAS: the excitability changes sustained by the PAS are limited to the muscles innervated by the peripheral afferents, which have been stimulated electrically (Stefan et al., 2000; Wolters et al., 2003). However, the PAS topographical specificity should be looked for more in the effect size of the induced effects rather than in the complete absence of PAS-induced facilitation in muscles innervated by nerves antagonist to that stimulated during the M1-PAS, as confirmed by several works (Carson & Kennedy, 2013; Suppa et al., 2017). In addition to the not-so-strict topographical specificity of the PAS, other considerations could justify the spread to the FCR muscle of the excitation induced by the PAS of the radial nerve and the cortical ECR hotspot. In several instances, FCR and ECR act synergistically. Even if FCR and ECR can act as antagonists to each other, such as in simple flexion-extension wrist movements, they have unique features that set them apart from other agonist-antagonist couples (Aguiar & Baker, 2018). For example, regarding their Ia innervation, which is likely involved in the M1-PAS, it has been questioned that the Ia-mediated reciprocal inhibition, a neurophysiological hallmark of the agonist-antagonist distinction, exists for the FCR and ECR in the human forearm (Pierrot-Deseilligny & Burke, 2012).

Summarizing: while the vm-PAS, using a visual afferent pathway to activate the AON, induces a more selective enhancement of CSE, which depends on an inner mirroring of the observed movement on which attention is put, the effects of the M1-PAS, using electrical nerve stimulation, seems to rely on the activation of synergic muscle representations.

Of importance, PAS effects emerged after a single stimulation session in our sample of patients, who were in a chronic stage of illness ( $30\pm 21$  months from stroke, on average) and presented a persistent hand motor impairment. This evidence corroborates previous literature (Ferris et al., 2018; Palmer et al., 2018) and suggests PAS efficacy beyond the subacute stages of stroke recovery, where cortical plasticity is heightened (Baroni et al., 2024), rendering patients more responsive to rehabilitation interventions (Kwakkel et al., 2004). Noteworthy, only the neurophysiological improvements induced by the vm-PAS, but not those by the M1-PAS, positively correlate with the time elapsed from stroke: the more chronic the motor deficit, the more effective the vm-PAS is. Central adaptive mechanisms can modify the sensory information hierarchy in the face of peripheral sensory deficit, leading to the reliance on more robust sensory information for action (Bernard-Espina et al., 2021; Ma et al., 2022). In the post-stroke chronic phase, the patient may thus develop an adaptation related to a visual reliance that engages the AON to compensate for the hand motor deficit.

Concerning the SICI, we replicated the muscle-specific enhancement of CSE after both PAS protocols, but without difference between conditioned and unconditioned MEPs, hence without modulating the SICI itself and indicating that they did not influence  $\gamma$ -aminobutyric acid receptors (GABA)-mediated inhibition (Butefisch, 2000; Hanajima et al., 1998), replicating previously evidence in patients (e.g., Castel-Lacanal et al., 2007; Ferris et al., 2018; Palmer et al., 2018; Quartarone et al., 2003).

Finally, the vm-PAS and the M1-PAS did not even have behavioral effects, at least concerning voluntary wrist movements and after a single protocol's administration. This result is consistent with the need for multiple PAS sessions to observe clinically relevant behavioral improvements in stroke [(Baroni et al., 2024; Liang et al., 2024; Sui et al., 2021), but see (Tarri et al., 2018) for controversial results].

## 5. CONCLUSION

In conclusion, our results provide the first evidence for the corticospinal efficacy of a visuomotor PAS protocol targeting the AON in post-stroke patients. Our findings suggest that the vm-PAS effectively induces short-

term cross-modal (i.e., visuomotor) associative plasticity within the lesioned M1, paving the way for the development of tailored PAS based, e.g., on the action observation of specific movements and gestures, as well as the exploration of the possible synergic effects of this protocol with motor training or other conventional post-stroke rehabilitation therapies (Bolognini et al., 2016; Dimyan & Cohen, 2011).

### **Data availability statement**

The data supporting the findings of this study will be publicly available on OSF (<https://osf.io/xgn7f>) upon publication.

### **CRedit AUTHORSHIP CONTRIBUTION STATEMENT**

**Michela Picardi:** conceptualization, methodology, investigation, formal analysis, visualization, writing – original draft

**Giacomo Guidali:** conceptualization, methodology, software, investigation, formal analysis, visualization, data curation, writing – original draft

**Antonio Caronni:** methodology, supervision, resources, writing – review and editing

**Viviana Rota:** software, writing – review and editing

**Massimo Corbo:** writing – review and editing

**Nadia Bolognini:** conceptualization, methodology, funding acquisition, project administration, supervision, resources, writing – original draft

| <i>subject</i> | <i>Age range (y)</i> | <i>sex</i> | <i>educational level (y)</i> | <i>lesion side</i> | <i>brain lesion</i>                      | <i>I/H</i> | <i>hemiparetic side</i> | <i>time after stroke (months)</i> | <i>HGS (affected side, Kg)</i> | <i>HGS (not affected side, Kg)</i> | <i>FMA -UL TOT (/66)</i> |
|----------------|----------------------|------------|------------------------------|--------------------|------------------------------------------|------------|-------------------------|-----------------------------------|--------------------------------|------------------------------------|--------------------------|
| <b>S01</b>     | 61-65                | f          | 8                            | L                  | left thalamic-capsular, lacunar          | I          | R                       | 4                                 | 21.8                           | 25.1                               | 63                       |
| <b>S02</b>     | 41-45                | f          | 18                           | L                  | left frontal                             | I          | R                       | 44                                | 8.7                            | 15.9                               | 47                       |
| <b>S03</b>     | 66-70                | f          | 11                           | L                  | left thalamic-capsular                   | I          | R                       | 39                                | 12.3                           | 13.6                               | 58                       |
| <b>S04</b>     | 31-35                | m          | 11                           | L                  | left hemispheric                         | I          | R                       | 31                                | 15.6                           | 36.6                               | 44                       |
| <b>S05</b>     | 66-70                | m          | 18                           | L                  | lenticular-capsular                      | H          | R                       | 25                                | 25.9                           | 30.8                               | 56                       |
| <b>S06</b>     | 61-65                | m          | 13                           | L                  | left thalamic-capsular                   | H          | R                       | 25                                | 41                             | 54.8                               | 63                       |
| <b>S07</b>     | 41-45                | f          | 23                           | L                  | left frontal-temporal-capsular           | I          | R                       | 7                                 | 23.5                           | 26.3                               | 60                       |
| <b>S08</b>     | 61-65                | m          | 17                           | L                  | left lenticular-capsular, corona radiata | I          | R                       | 21                                | 41.9                           | 45                                 | 62                       |
| <b>S09</b>     | 71-75                | m          | 8                            | L                  | left frontal-parietal                    | I          | R                       | 6                                 | 20                             | 25.5                               | 58                       |
| <b>S10</b>     | 81-85                | m          | 18                           | L                  | left thalamic-capsular                   | H          | R                       | 6                                 | 9.6                            | 25.2                               | 47                       |
| <b>S11</b>     | 66-70                | m          | 8                            | L                  | left cortical-subcortical                | I          | R                       | 35                                | 23.8                           | 24.5                               | 64                       |
| <b>S12</b>     | 71-75                | m          | 8                            | L                  | left, frontal-parietal-temporal          | I          | R                       | 29                                | 35.6                           | 29.5                               | 65                       |

|             |       |   |             |   |                              |   |   |           |                              |                                |                            |
|-------------|-------|---|-------------|---|------------------------------|---|---|-----------|------------------------------|--------------------------------|----------------------------|
| <b>S13</b>  | 56-60 | m | 18          | L | left capsular nucleus        | I | R | 82        | 25                           | 38.4                           | 49                         |
| <b>S14</b>  | 56-60 | m | 18          | L | left cortical-subcortical    | I | R | 49        | 32.4                         | 35.7                           | 62                         |
| <b>S15</b>  | 66-70 | m | 18          | L | left corona radiata, putamen | I | R | 51        | 15.7                         | 30.6                           | 53                         |
| <b>mean</b> |       |   | <b>15.8</b> |   |                              |   |   | <b>25</b> | <b>23.65 (median)</b>        | <b>27.9 (median)</b>           | <b>59 (median)</b>         |
| <b>SD</b>   |       |   | <b>4.4</b>  |   |                              |   |   | <b>21</b> | <b>15.65 (Q1)-29.15 (Q3)</b> | <b>25.15 (Q1) – 36.15 (Q3)</b> | <b>51 (Q1) – 62.5 (Q3)</b> |

**Table 1.** Demographic and clinical characteristics of stroke sample. All patients had a left-sided hemispheric lesion; hence, a right-sided upper limb hemiparesis. Legend: F=female, M=male, I=ischemic stroke, H=hemorrhagic stroke, HGS=Hand Grip Strength, FMA-UL=Fugl-Meyer Assessment Upper Limb, OCS=Oxford Cognitive Scale, SD=standard deviation

## REFERENCES

- Aguiar, S. A., & Baker, S. N. (2018). Convergent spinal circuits facilitating human wrist flexors. *Journal of Neuroscience*, *38*(16), 3929–3938. <https://doi.org/10.1523/JNEUROSCI.1870-17.2018>
- Ahmed, M. A., Mohamed, S. A., & Sayed, D. (2011). Long-term antalgic effects of repetitive transcranial magnetic stimulation of motor cortex and serum beta-endorphin in patients with phantom pain. *Neurological Research*, *33*(9), 953–958. <https://doi.org/10.1179/1743132811Y.0000000045>
- Amoruso, L., & Urgesi, C. (2016). Contextual modulation of motor resonance during the observation of everyday actions. *NeuroImage*, *134*, 74–84. <https://doi.org/10.1016/j.neuroimage.2016.03.060>
- Anson, J. G., Hasegawa, Y., Kasai, T., Latash, M. L., & Yahagi, S. (2002). EMG discharge patterns during human grip movement are task-dependent and not modulated by muscle contraction modes: a transcranial magnetic stimulation (TMS) study. In *Brain Research* (Vol. 934). [www.elsevier.com/locate/bres](http://www.elsevier.com/locate/bres)
- Anwer, S., Waris, A., Gilani, S. O., Iqbal, J., Shaikh, N., Pujari, A. N., & Niazi, I. K. (2022). Rehabilitation of Upper Limb Motor Impairment in Stroke: A Narrative Review on the Prevalence, Risk Factors, and Economic Statistics of Stroke and State of the Art Therapies. *Healthcare*, *10*(2), 190. <https://doi.org/10.3390/healthcare10020190>
- Awiszus, F. (2003). TMS and threshold hunting. *Supplements to Clinical Neurophysiology*, *56*(C), 13–23. [https://doi.org/10.1016/S1567-424X\(09\)70205-3](https://doi.org/10.1016/S1567-424X(09)70205-3)
- Baroni, A., Antonioni, A., Fregna, G., Lamberti, N., Manfredini, F., Koch, G., D'Ausilio, A., & Straudi, S. (2024). The Effectiveness of Paired Associative Stimulation on Motor Recovery after Stroke: A Scoping Review. *Neurology International*, *16*(3), 567–589. <https://doi.org/10.3390/neurolint16030043>
- Bernard-Espina, J., Beranek, M., Maier, M. A., & Tagliabue, M. (2021). Multisensory Integration in Stroke Patients: A Theoretical Approach to Reinterpret Upper-Limb Proprioceptive Deficits and Visual Compensation. *Frontiers in Neuroscience*, *15*. <https://doi.org/10.3389/fnins.2021.646698>
- Bolognini, N., Russo, C., & Edwards, D. J. (2016). The sensory side of post-stroke motor rehabilitation. *Restorative Neurology and Neuroscience*, *34*(4), 571–586. <https://doi.org/10.3233/RNN-150606>
- Bunday, K. L., Lemon, R. N., Kilner, J. M., Davare, M., & Orban, G. A. (2016). Grasp-specific motor resonance is influenced by the visibility of the observed actor. *Cortex*, *84*, 43–54. <https://doi.org/10.1016/j.cortex.2016.09.002>
- Butefisch, C. M. (2000). Mechanisms of use-dependent plasticity in the human motor cortex. *Proceedings of the National Academy of Sciences*, *97*(7), 3661–3665. <https://doi.org/10.1073/pnas.050350297>
- Carson, R. G., & Kennedy, N. C. (2013). Modulation of human corticospinal excitability by paired associative stimulation. *Frontiers in Human Neuroscience*, *7*(December), 1–28. <https://doi.org/10.3389/fnhum.2013.00823>
- Carson, R. G., & Rankin, M. L. (2018). Shaping the effects of associative brain stimulation by contractions of the opposite limb. *Frontiers in Psychology*, *9*(NOV), 1–12. <https://doi.org/10.3389/fpsyg.2018.02249>
- Castel-Lacanal, E., Gerdelat-Mas, A., Marque, P., Loubinoux, I., & Simonetta-Moreau, M. (2007). Induction of cortical plastic changes in wrist muscles by paired associative stimulation in healthy subjects and post-stroke patients. *Experimental Brain Research*, *180*(1), 113–122. <https://doi.org/10.1007/s00221-006-0844-5>



- Castel-Lacanal, E., Marque, P., & Tardy, J. (2009). Induction of Cortical Plastic Changes in Wrist Muscles by Paired Associative Stimulation in the Recovery Phase of Stroke Patients. *Neurorehabilitation and Neural Repair*, 825, 366–372.
- Cavallo, A., Becchio, C., Sartori, L., Bucchioni, G., & Castiello, U. (2012). Grasping with tools: Corticospinal excitability reflects observed hand movements. *Cerebral Cortex*, 22(3), 710–716. <https://doi.org/10.1093/cercor/bhr157>
- Chiappini, E., Turrini, S., Zanon, M., Marangon, M., Borgomaneri, S., & Avenanti, A. (2024). Driving Hebbian plasticity over ventral premotor-motor projections transiently enhances motor resonance. *Brain Stimulation*, 17(2), 211–220. <https://doi.org/10.1016/j.brs.2024.02.011>
- Di Pino, G., Pellegrino, G., Assenza, G., Capone, F., Ferreri, F., Formica, D., Ranieri, F., Tombini, M., Ziemann, U., Rothwell, J. C., & Di Lazzaro, V. (2014). Modulation of brain plasticity in stroke: A novel model for neurorehabilitation. In *Nature Reviews Neurology* (Vol. 10, Issue 10, pp. 597–608). Nature Publishing Group. <https://doi.org/10.1038/nrneurol.2014.162>
- Dimyan, M. A., & Cohen, L. G. (2011). Neuroplasticity in the context of motor rehabilitation after stroke. In *Nature Reviews Neurology* (Vol. 7, Issue 2, pp. 76–85). <https://doi.org/10.1038/nrneurol.2010.200>
- Dissanayaka, T., Zoghi, M., Farrell, M., Egan, G., & Jaberzadeh, S. (2018). Comparison of Rossini–Rothwell and adaptive threshold-hunting methods on the stability of TMS induced motor evoked potentials amplitudes. *Journal of Neuroscience Research*, 96(11), 1758–1765. <https://doi.org/10.1002/jnr.24319>
- Fadiga, L., Fogassi, L., Pavesi, G., & Rizzolatti, G. (1995). Motor Facilitation During Action Observation: a Magnetic Stimulation Study. *Journal of Neurophysiology*, 73(6), 2608–2611.
- Faul, F., Erdfelder, E., Buchner, A., & Lang, A. G. (2009). Statistical power analyses using G\*Power 3.1: Tests for correlation and regression analyses. *Behavior Research Methods*, 41(4), 1149–1160. <https://doi.org/10.3758/BRM.41.4.1149>
- Ferris, J. K., Neva, J. L., Francisco, B. A., & Boyd, L. A. (2018). Bilateral Motor Cortex Plasticity in Individuals With Chronic Stroke, Induced by Paired Associative Stimulation. *Neurorehabilitation and Neural Repair*, 32(8), 671–681. <https://doi.org/10.1177/1545968318785043>
- Franceschini, M., Ceravolo, M. G., Agosti, M., Cavallini, P., Bonassi, S., Dall’Armi, V., Massucci, M., Schifini, F., & Sale, P. (2012). Clinical relevance of action observation in upper-limb stroke rehabilitation: A possible role in recovery of functional dexterity. A randomized clinical trial. *Neurorehabilitation and Neural Repair*, 26(5), 456–462. <https://doi.org/10.1177/1545968311427406>
- Fugl-Meyer, A. R., Jääskö, L., Leyman, I., Olsson, S., & Steglind, S. (1975). The post-stroke hemiplegic patient. 1. a method for evaluation of physical performance. *Scandinavian Journal of Rehabilitation Medicine*, 7(1), 13–31. <http://www.ncbi.nlm.nih.gov/pubmed/1135616>
- Gangitano, M., Mottaghy, F. M., & Pascual-leone, A. (2001). Phase-specific modulation of cortical motor output during movement observation. *Cortex*, 12(7), 1489–1492.
- Guidali, G., Arrigoni, E., Bolognini, N., & Pisoni, A. (2024). M1 Large-scale Network Dynamics Support Human Motor Resonance and Its Plastic Reshaping. *BioRxiv*, 1–38. <https://doi.org/10.1101/2024.06.10.598208>
- Guidali, G., Carneiro, M. I. S., & Bolognini, N. (2020). Paired Associative Stimulation drives the emergence of motor resonance. *Brain Stimulation*, 13(3), 627–636. <https://doi.org/10.1016/j.brs.2020.01.017>

- Guidali, G., Picardi, M., Franca, M., Caronni, A., & Bolognini, N. (2023). The social relevance and the temporal constraints of motor resonance in humans. *Scientific Reports*, *13*(1), 15933. <https://doi.org/10.1038/s41598-023-43227-2>
- Guidali, G., Picardi, M., Gramegna, C., & Bolognini, N. (2023). Modulating motor resonance with paired associative stimulation: Neurophysiological and behavioral outcomes. *Cortex*, *163*, 139–153. <https://doi.org/10.1016/j.cortex.2023.03.006>
- Guidali, G., Roncoroni, C., & Bolognini, N. (2021a). Modulating Frontal Networks' Timing-Dependent-Like Plasticity With Paired Associative Stimulation Protocols: Recent Advances and Future Perspectives. *Frontiers in Human Neuroscience*, *15*(April), 658723. <https://doi.org/10.3389/fnhum.2021.658723>
- Guidali, G., Roncoroni, C., & Bolognini, N. (2021b). Paired associative stimulations: Novel tools for interacting with sensory and motor cortical plasticity. *Behavioural Brain Research*, *414*(September), 113484. <https://doi.org/10.1016/j.bbr.2021.113484>
- Hamilton, G. F., McDonald, C., & Chenier, T. C. (1992). Measurement of Grip Strength: Validity and Reliability of the Sphygmomanometer and Jamar Grip Dynamometer. *Journal of Orthopaedic & Sports Physical Therapy*, *16*(5), 215–219. <https://doi.org/10.2519/jospt.1992.16.5.215>
- Hanajima, R., Ugawa, Y., Terao, Y., Sakai, K., Furubayashi, T., Machii, K., & Kanazawa, I. (1998). Paired-pulse magnetic stimulation of the human motor cortex: Differences among I waves. *Journal of Physiology*, *509*(2), 607–618. <https://doi.org/10.1111/j.1469-7793.1998.607bn.x>
- Kamper, D. G., Harvey, R. L., Suresh, S., & Rymer, W. Z. (2003). Relative contributions of neural mechanisms versus muscle mechanics in promoting finger extension deficits following stroke. *Muscle and Nerve*, *28*(3), 309–318. <https://doi.org/10.1002/mus.10443>
- Kemmerer, D. (2021). What modulates the Mirror Neuron System during action observation?: Multiple factors involving the action, the actor, the observer, the relationship between actor and observer, and the context. *Progress in Neurobiology*, *205*, 102128. <https://doi.org/10.1016/J.PNEUROBIO.2021.102128>
- Koch, G., Versace, V., Bonni, S., Lupo, F., Gerfo, E. Lo, Oliveri, M., & Caltagirone, C. (2010). Resonance of cortico-cortical connections of the motor system with the observation of goal directed grasping movements. *Neuropsychologia*, *48*(12), 3513–3520. <https://doi.org/10.1016/j.neuropsychologia.2010.07.037>
- Kujirai, T., Caramia, M. D., Rothwell, J. C., Day, B. L., Thompson, P. D., Ferbert, A., Wroe, S., Asselman, P., & Marsden, C. D. (1993). Corticocortical inhibition in human motor cortex. *Journal of Physiology*, *471*, 501–519.
- Kwakkel, G., Kollen, B., & Lindeman, E. (2004). Understanding the pattern of functional recovery after stroke: Facts and theories. *Restorative Neurology and Neuroscience*, *22*(3–5), 281–299.
- Lang, C. E., Strube, M. J., Bland, M. D., Waddell, K. J., Cherry-Allen, K. M., Nudo, R. J., Dromerick, A. W., & Birkenmeier, R. L. (2016). Dose response of task-specific upper limb training in people at least 6 months poststroke: A phase II, single-blind, randomized, controlled trial. *Annals of Neurology*, *80*(3), 342–354. <https://doi.org/10.1002/ana.24734>
- Liang, S., Wang, W., Yu, F., Pan, L., Xu, D., Hu, R., Tian, S., Xiang, J., & Zhu, Y. (2024). Repetitive Peripheral Magnetic Stimulation Combined With Transcranial Magnetic Stimulation in Rehabilitation of Upper

- Extremity Hemiparesis Following Stroke: a Pilot Study. *Journal of Rehabilitation Medicine*, 56. <https://doi.org/10.2340/jrm.v56.19449>
- Ma, L., Marshall, P. J., & Wright, W. G. (2022). The impact of external and internal focus of attention on visual dependence and EEG alpha oscillations during postural control. *Journal of NeuroEngineering and Rehabilitation*, 19(1). <https://doi.org/10.1186/s12984-022-01059-7>
- Mancuso, M., Varalta, V., Sardella, L., Capitani, D., Zoccolotti, P., Antonucci, G., The Italian OCS Group, Abbruzzese, L., Fonte, C., La Monica, G. V., Meneghello, F., Pallotta, M., Pirrotta, F., & Smania, N. (2016). Italian normative data for a stroke specific cognitive screening tool: the Oxford Cognitive Screen (OCS). *Neurological Sciences*, 37(10), 1713–1721. <https://doi.org/10.1007/s10072-016-2650-6>
- Martino Cinnera, A., Picerno, P., Bisirri, A., Koch, G., Morone, G., & Vannozzi, G. (2024). Upper limb assessment with inertial measurement units according to the international classification of functioning in stroke: a systematic review and correlation meta-analysis. In *Topics in Stroke Rehabilitation* (Vol. 31, Issue 1, pp. 66–85). Taylor and Francis Ltd. <https://doi.org/10.1080/10749357.2023.2197278>
- Mayo, N. E., Wood-Dauphinee, S., Côté, R., Durcan, L., & Carlton, J. (2002). Activity, participation, and quality of life 6 months poststroke. *Archives of Physical Medicine and Rehabilitation*, 83(8), 1035–1042. <https://doi.org/10.1053/apmr.2002.33984>
- Montagna, M., Cerri, G., Borroni, P., & Baldissera, F. (2005). Excitability changes in human corticospinal projections to muscles moving hand and fingers while viewing a reaching and grasping action. *European Journal of Neuroscience*, 22(6), 1513–1520. <https://doi.org/10.1111/j.1460-9568.2005.04336.x>
- Naish, K. R., Houston-Price, C., Bremner, A. J., & Holmes, N. P. (2014). Effects of action observation on corticospinal excitability: Muscle specificity, direction, and timing of the mirror response. *Neuropsychologia*, 64, 331–348. <https://doi.org/10.1016/j.neuropsychologia.2014.09.034>
- Palmer, J. A., Wolf, S. L., & Borich, M. R. (2018). Paired associative stimulation modulates corticomotor excitability in chronic stroke: A preliminary investigation. *Restorative Neurology and Neuroscience*, 36(2), 183–194. <https://doi.org/10.3233/RNN-170785>
- Pierrot-Deseilligny, E., & Burke, D. (2012). *The Circuitry of the Human Spinal Cord: Spinal and Corticospinal Mechanisms of Movement*. Cambridge University Press.
- Pollock, A., Farmer, S. E., Brady, M. C., Langhorne, P., Mead, G. E., Mehrholz, J., & van Wijck, F. (2014). Interventions for improving upper limb function after stroke (Cochrane review) [with consumer summary]. *Cochrane Database of Systematic Reviews*, 11(11), CD010820–CD010820. <https://doi.org/10.1002/14651858.CD010820.pub2.www.cochranelibrary.com>
- Puglisi, G., Leonetti, A., Landau, A., Fornia, L., Cerri, G., & Borroni, P. (2017). The role of attention in human motor resonance. *PLoS ONE*, 12(5), 1–21. <https://doi.org/10.1371/journal.pone.0177457>
- Quartarone, A., Bagnato, S., Rizzo, V., Siebner, H. R., Dattola, V., Scalfari, A., Morgante, F., Battaglia, F., Romano, M., & Girlanda, P. (2003). Abnormal associative plasticity of the human motor cortex in writer’s cramp. *Brain*, 126(12), 2586–2596. <https://doi.org/10.1093/brain/awg273>
- R Core Team. (2019). *R: A language and Environment for Statistical Computing*. R Foundation for Statistical Computing. <http://www.r-project.org/>

- Rizzolatti, G., & Craighero, L. (2004). The Mirror-Neuron System. *Annual Review of Neuroscience*, 27(1), 169–192. <https://doi.org/10.1146/annurev.neuro.27.070203.144230>
- Rossi, S., Antal, A., Bestmann, S., Bikson, M., Brewer, C., Brockmüller, J., Carpenter, L. L., Cincotta, M., Chen, R., Daskalakis, J. D., Di Lazzaro, V., Fox, M. D., George, M. S., Gilbert, D., Kimiskidis, V. K., Koch, G., Ilmoniemi, R. J., Pascual Lefaucheur, J., Leocani, L., ... Hallett, M. (2021). Safety and recommendations for TMS use in healthy subjects and patient populations, with updates on training, ethical and regulatory issues: Expert Guidelines. *Clinical Neurophysiology*, 132(1), 269–306. <https://doi.org/10.1016/J.CLINPH.2020.10.003>
- Sale, M. V., Ridding, M. C., & Nordstrom, M. a. (2007). Factors influencing the magnitude and reproducibility of corticomotor excitability changes induced by paired associative stimulation. *Experimental Brain Research*, 181(4), 615–626. <https://doi.org/10.1007/s00221-007-0960-x>
- Schuch, S., Bayliss, A. P., Klein, C., & Tipper, S. P. (2010). Attention modulates motor system activation during action observation: Evidence for inhibitory rebound. *Experimental Brain Research*, 205(2), 235–249. <https://doi.org/10.1007/s00221-010-2358-4>
- Silverstein, J., Cortes, M., Tsagaris, K. Z., Climent, A., Gerber, L. M., Oromendia, C., Fonzetti, P., Ratan, R. R., Kitago, T., Iacoboni, M., Wu, A., Dobkin, B., & Edwards, D. J. (2019). Paired Associative Stimulation as a Tool to Assess Plasticity Enhancers in Chronic Stroke. *Frontiers in Neuroscience*, 13(August), 1–10. <https://doi.org/10.3389/fnins.2019.00792>
- Stefan, K., Kunesch, E., Cohen, L. G., Benecke, R., & Classen, J. (2000). Induction of plasticity in the human motor cortex by paired associative stimulation. *Brain: A Journal of Neurology*, 123, 572–584. <https://doi.org/10.1093/brain/123.3.572>
- Stefan, K., Wycislo, M., & Classen, J. (2004). Modulation of associative human motor cortical plasticity by attention. *Journal of Neurophysiology*, 92(1), 66–72. <https://doi.org/10.1152/jn.00383.2003>
- Su, F., & Xu, W. (2020). Enhancing Brain Plasticity to Promote Stroke Recovery. In *Frontiers in Neurology* (Vol. 11). Frontiers Media S.A. <https://doi.org/10.3389/fneur.2020.554089>
- Sui, Y. F., Tong, L. Q., Zhang, X. Y., Song, Z. H., & Guo, T. C. (2021). Effects of paired associated stimulation with different stimulation position on motor cortex excitability and upper limb motor function in patients with cerebral infarction. *Journal of Clinical Neuroscience*, 90, 363–369. <https://doi.org/10.1016/j.jocn.2021.06.028>
- Suppa, A., Quartarone, A., Siebner, H., Chen, R., Di Lazzaro, V., Del Giudice, P., Paulus, W., Rothwell, J. C., Ziemann, U., & Classen, J. (2017). The associative brain at work: Evidence from paired associative stimulation studies in humans. *Clinical Neurophysiology*, 128(11), 2140–2164. <https://doi.org/10.1016/j.clinph.2017.08.003>
- Tarri, M., Brimhat, N., Gasq, D., Lepage, B., Loubinoux, I., De Boissezon, X., Marque, P., & Castel-Lacanal, E. (2018). Five-day course of paired associative stimulation fails to improve motor function in stroke patients. *Annals of Physical and Rehabilitation Medicine*, 61(2), 78–84. <https://doi.org/10.1016/j.rehab.2017.11.002>
- The Jamovi Project. (2023). *Jamovi (version 2.3) [Computer Software]*. Retrieved from <https://www.jamovi.org>.
- Thieme, H., Morkisch, N., Mehrholz, J., Pohl, M., Behrens, J., Borgetto, B., & Dohle, C. (2018). Mirror therapy for improving motor function after stroke. In *Cochrane Database of Systematic Reviews* (Vol. 2018, Issue 7). John Wiley and Sons Ltd. <https://doi.org/10.1002/14651858.CD008449.pub3>

- Tropea, P., Infarinato, F., Sterpi, I., Ottaviani, M., Antoniotti, P., Romano, P., Picardi, M., Goffredo, M., Re, R., Pournajaf, S., Seregini, A., Caronni, A., Franceschini, M., & Corbo, M. (2023). Action Observation Treatment for Upper Limb Rehabilitation in Patients With Stroke: Protocol for a Multicenter Randomized Controlled Trial. *JMIR Research Protocols*, 12. <https://doi.org/10.2196/42094>
- Turrini, S., Fiori, F., Bevacqua, N., Saracini, C., Lucero, B., Candidi, M., & Avenanti, A. (2024). Spike-timing-dependent plasticity induction reveals dissociable supplementary- and premotor-motor pathways to automatic imitation. *Proceedings of the National Academy of Sciences of the United States of America*, 121(27), e2404925121. <https://doi.org/10.1073/pnas.2404925121>
- Wischniewski, M., & Schutter, D. J. L. G. (2016). Efficacy and time course of paired associative stimulation in cortical plasticity: Implications for neuropsychiatry. *Clinical Neurophysiology*, 127(1), 732–739. <https://doi.org/10.1016/j.clinph.2015.04.072>
- Wolters, A., Sandbrink, F., Schlottmann, A., Kunesch, E., Stefan, K., Cohen, L. G., Benecke, R., & Classen, J. (2003). A temporally asymmetric Hebbian rule governing plasticity in the human motor cortex. *Journal of Neurophysiology*, 89(5), 2339–2345. <https://doi.org/10.1152/jn.00900.2002>
- Zhang, C., Li, X., & Wang, H. (2023). Application of action observation therapy in stroke rehabilitation: A systematic review. In *Brain and Behavior* (Vol. 13, Issue 8). John Wiley and Sons Ltd. <https://doi.org/10.1002/brb3.3157>
